# Supplementary figures and images for: Dystroglycan controls signaling of multiple hormones through modulation of STAT5 activity
Source: Oxford University Press journal article supplement (doi:10.1242/jcs.070680), 2010-10-13

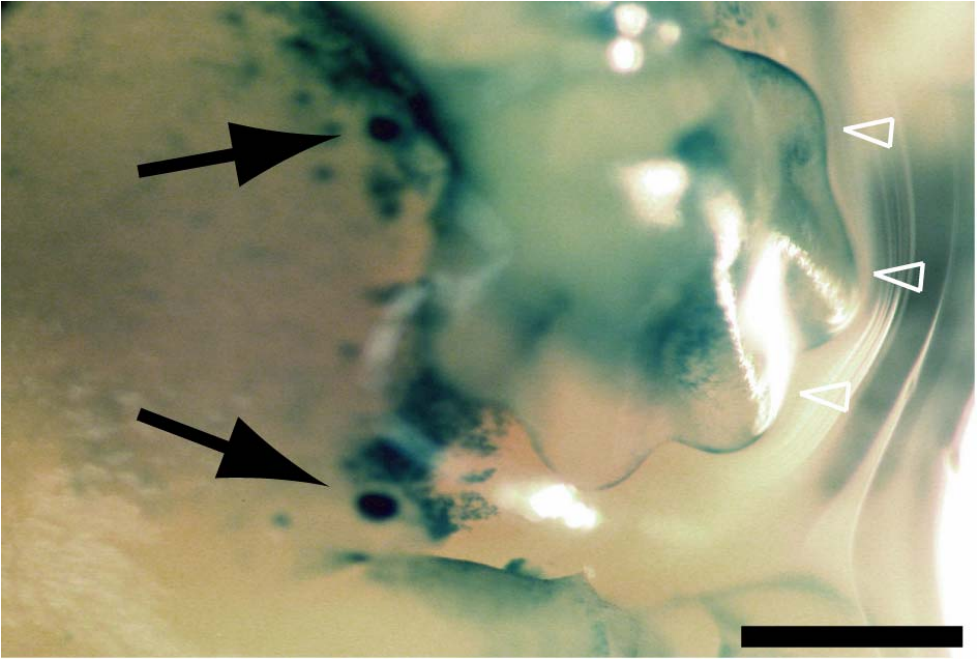

Supplement: jcs070680figs1.pdf [file jcs070680figs1.pdf]

**Cre<sup>-</sup>**

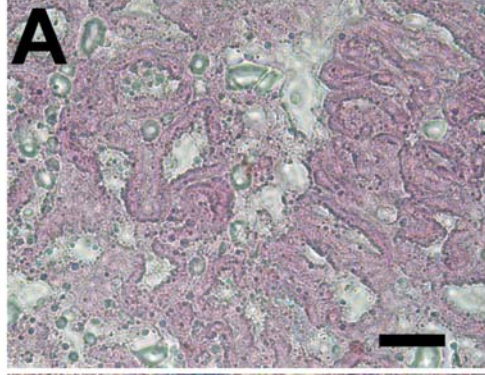

**$\Delta$ DGK<sup>14</sup>-Cre**

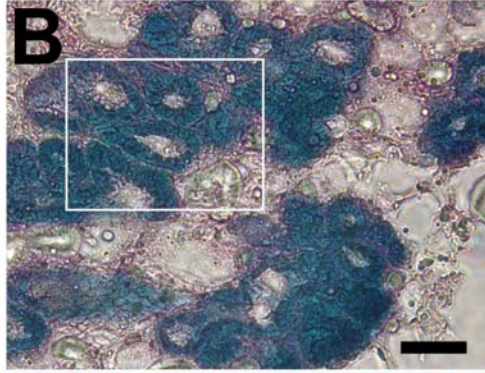

**$\Delta$ DGK<sup>14</sup>-Cre**

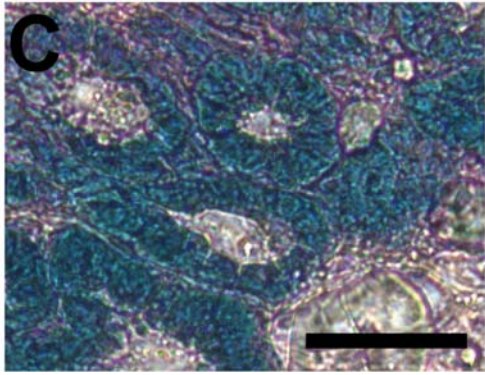

Supplement: jcs070680figs2.pdf [file jcs070680figs2.pdf]

Control ← Mother →  $\Delta$ DG<sup>K14-cre</sup>

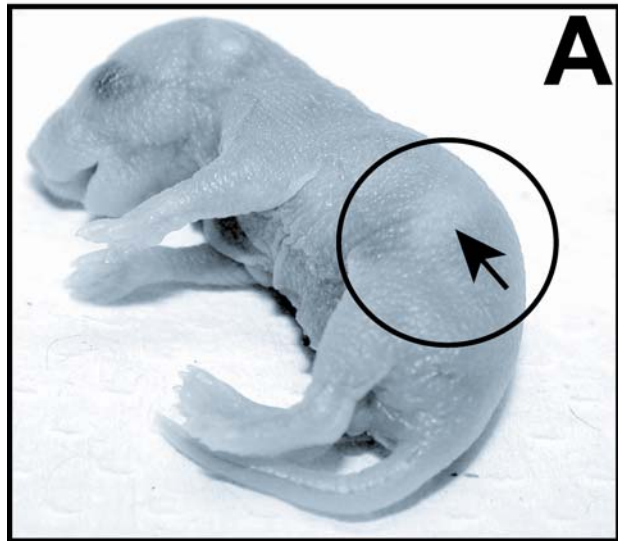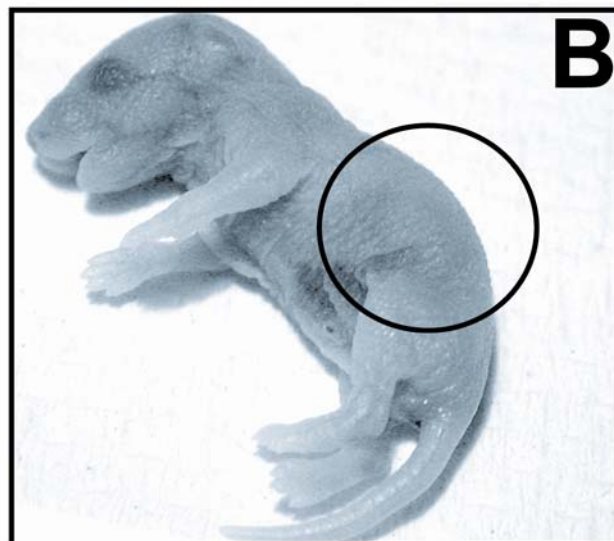

Supplement: jcs070680figs3.pdf [file jcs070680figs3.pdf]

# Control

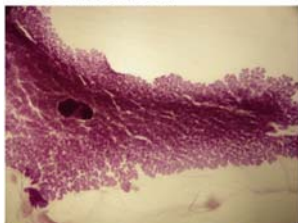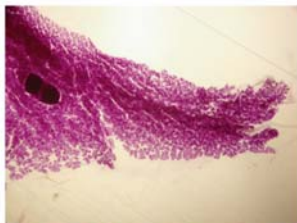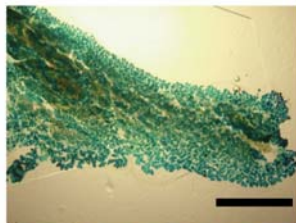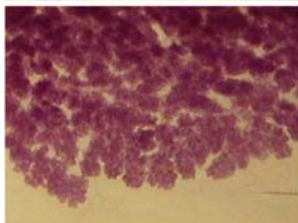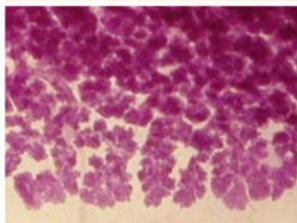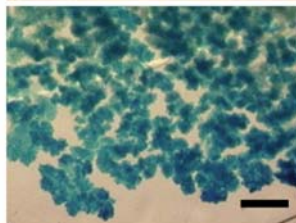

# $\Delta$ DGK14-Cre

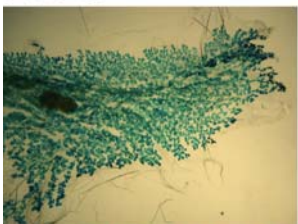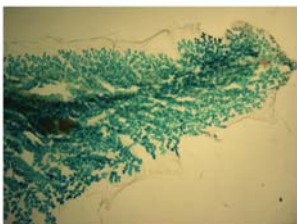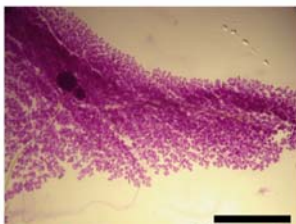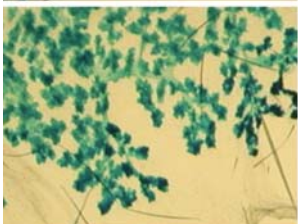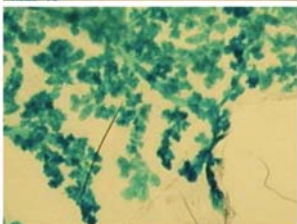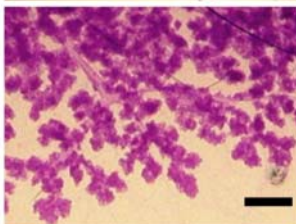

Supplement: jcs070680figs4.pdf [file jcs070680figs4.pdf]

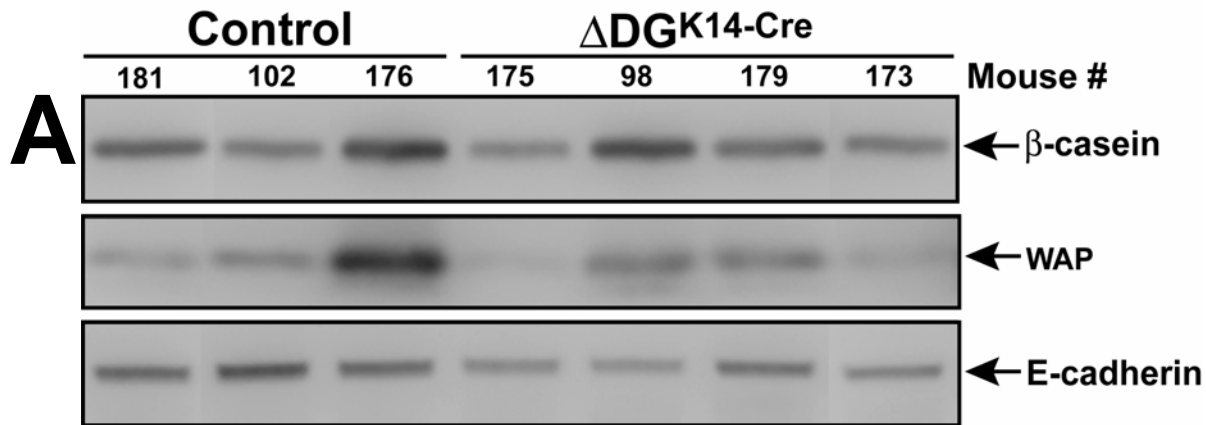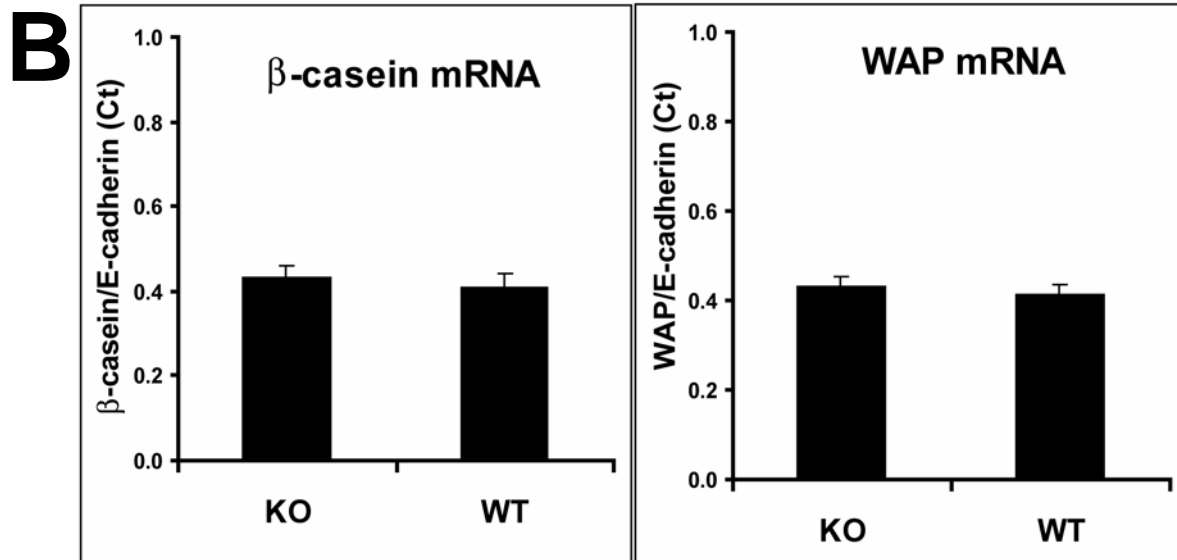

Supplement: jcs070680figs5.pdf [file jcs070680figs5.pdf]

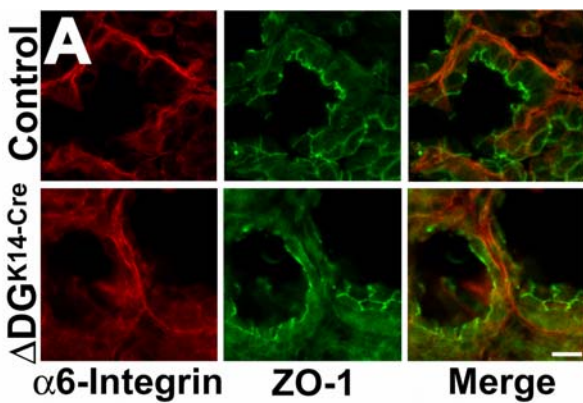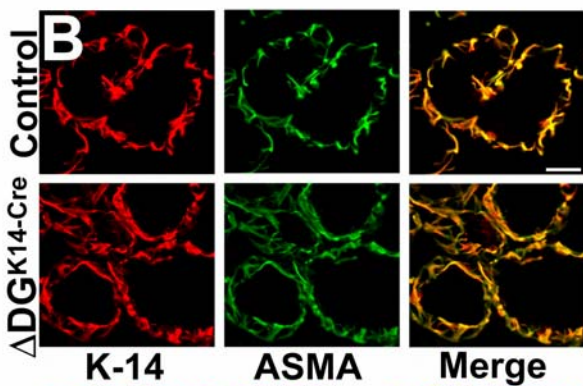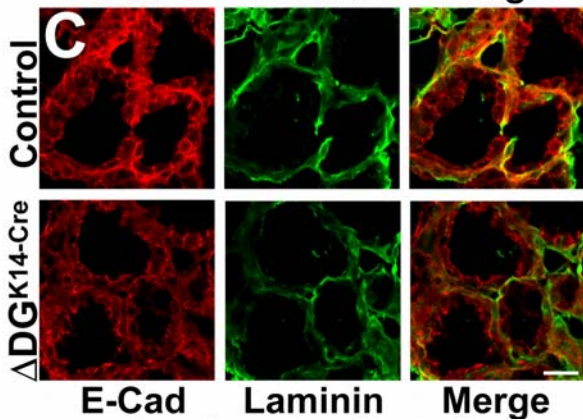

Supplement: jcs070680figs6.pdf [file jcs070680figs6.pdf]

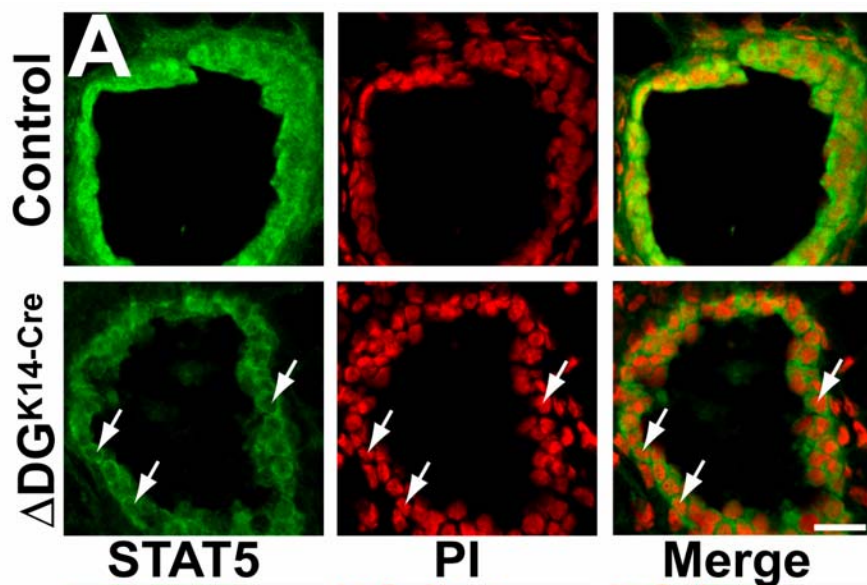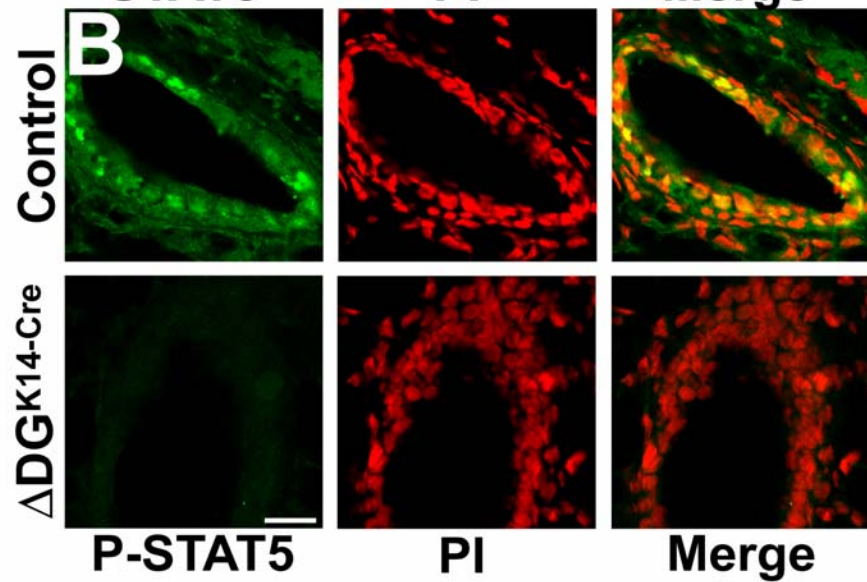

Supplement: jcs070680figs7.pdf [file jcs070680figs7.pdf]

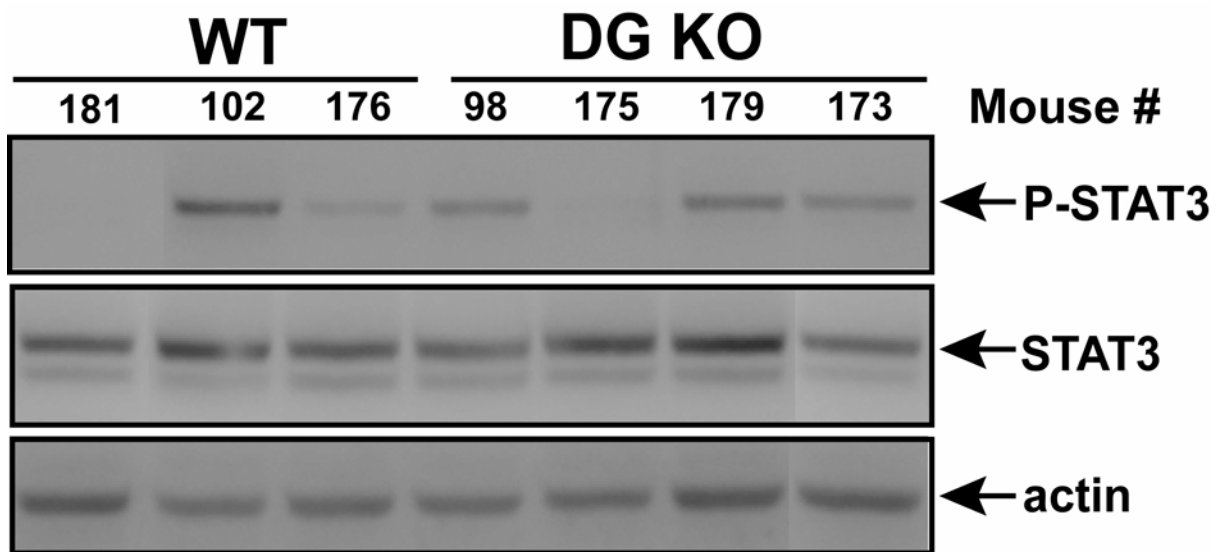

Supplement: jcs070680figs8.pdf [file jcs070680figs8.pdf]
